# Supplementary material
Source: Springer Nature journal article supplement (https://www.springermedizin.de/resource/supplementary/12911_2005_107_MOESM1_ESM.pdf/9527144)

**DNSGP-2****SFK**

Medication file

Patient file

Practice ID  
Patient ID  
Prescription date  
ATC-code drug  
ICPC-diagnosis  
Prescribed units  
.....  
.....

Patient ID  
Date of birth  
Gender  
Type of insurance  
Postal code  
.....  
.....

Gender  
Year of birth  
Postal code  
Up to 10 ATC-code's  
Prescription date

Medication file

Patient file

Pharmacy ID  
Patient ID  
Dispensing date  
ATC-code drug  
Dispensed units  
.....  
.....

Pharmacy ID  
Patient ID  
Coded AGB GP  
Year of birth  
Gender  
Postal code  
Insurance company  
.....

Gender  
Year of birth  
Postal code  
Up to 10 ATC-code's  
Dispensing date  $\pm$  4 days

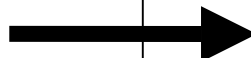

Supplement: MOESM1 [file 9527144]
